# Supplementary material
Source: HighWire-hosted journal article supplement (https://jcs.biologists.org/content/suppl/2008/12/13/122.1.55)

Gab1-GFP

Epo [min]

0

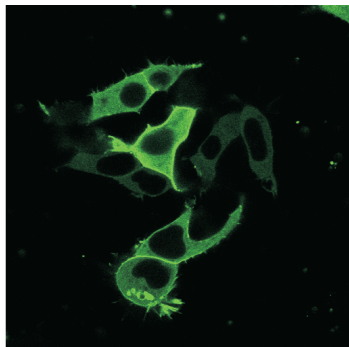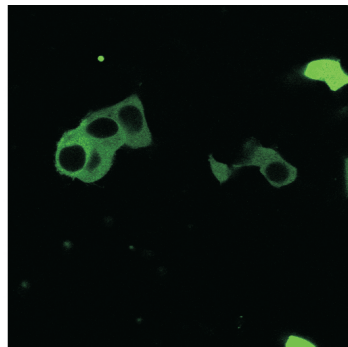

20

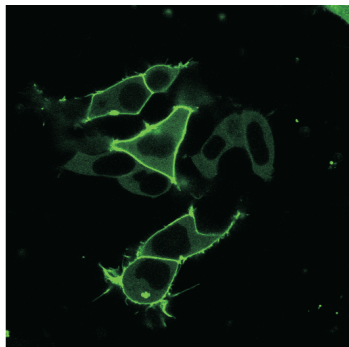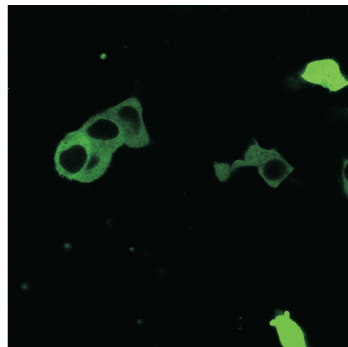

DMSO

15 min pre  
100 nM wortmannin

HEK-T

Supplement: 037226-FigS2.pdf [file 037226-FigS2.pdf]
